# Supplementary material
Source: publisher site journal article supplement (http://www.degruyter.com/publication/journal_key/JEEH/downloadAsset/JEEH_JEEH_Call_for_Papers_Covid19.pdf)
Supplement: Supplementary file 1 [file JEEH_JEEH_Call_for_Papers_Covid19.pdf]

# **Journal des Economistes et des Etudes Humaines**

## **CALL FOR PAPERS**

### **Special Issue**

## **Economic, Political and Social Impacts of COVID-19**

**DEADLINE: November 15, 2020**

Journal des Economistes et des Etudes Humaines (JEEH) invites submissions for an upcoming special issue “Economic, Political and Social Impacts of COVID-19.” Accepted papers will be published in a 2020 and/or 2021 issue.

#### **On Topics**

How to cope with the COVID-19 pandemic is today’s paramount issue: doing so would require coordination and collaboration from various fields. For related academic work, multi-disciplinary approaches from law and economics and other related fields would only be natural.

JEEH will designate a special issue and will explore some of the challenging issues. Topics that JEEH would consider include the following. Please note that the following list is only suggestive and is not meant to be comprehensive. JEEH is open to submissions from economists, researchers, and scholars from many other areas. JEEH welcomes submissions of articles containing creative and intriguing ideas.

- How to improve legal, economic and regulatory systems to prevent and control the spread of SARS-CoV-2 more effectively;
- How to deal with privacy, liberty, ethics, and other human rights challenges when tracing contacts, releasing patients’ demographic information, implementing social distancing, mounting aggressive measures such as lockdown or roadblock, or engaging in other public health activities;
- How to allocate vaccines, personal protective equipment, and other medical resources, internationally and domestically; what role for intellectual property rights;
- How to deal with trade-offs among various legal, economic, public health, and ethical values;
- How to (re)structure public health systems and/or rely on private initiatives in order to deal with COVID-19 and future pandemics;
- How to make sure that our governments properly take into account the risk of a future pandemic; including through farming and agricultural policies.

## Guidelines for Submission

1. Submission should follow the guidelines that are available at JEEH's URL. The same URL should also be used for submission.

### **Journal des Économistes et des Études Humaines**

JEEH submission site: <https://mc.manuscriptcentral.com/dqjeeh>

2. An abstract of not more than 150 words should accompany each manuscript. The abstract should state briefly the purpose of the research, the principal results and major conclusions.
3. For inquiries, please e-mail: Prof. Pierre Garelo: [pierre.garelo@univ-amu.fr](mailto:pierre.garelo@univ-amu.fr)
4. For questions on submission: Sabina Saddique [journal.editor@degruyter.com](mailto:journal.editor@degruyter.com)
